# Supplementary material
Source: PubMed Central journal article supplement (PMC3911370)
Supplement: IAI.00971-13_zii999090520so1.pdf [file IAI.00971-13_zii999090520so1.pdf]

**Supplementary Table 1. Schematic presentation of Bphs, Bpss, and Bpbs in inbred mouse strains.**

|                                 | <b>Bphs</b> | <b>Bpss</b> | <b>LD<sub>50</sub></b> | <b>Bpbs</b> | <b>LD<sub>50</sub></b> |
|---------------------------------|-------------|-------------|------------------------|-------------|------------------------|
| SM/J                            | +           | +++         | 1.0                    | +           | 40.0                   |
| SJL/J                           | +           | +++         | 2.6                    | ++          | 22.5                   |
| AKR/J                           | -           | +++         | 3.2                    | +           | 35.6                   |
| MRL/MpJ                         | -           | +++         | 2.9                    | -           |                        |
| LG/J                            | +           | ++          | 5.4                    | -           |                        |
| RFM/UnNCr                       | +           | +           | 26.2                   | n/d         |                        |
| PL/J                            | +           | +           | 29.8                   | n/d         |                        |
| DBA/1J                          | +           | +           | 28.6                   | n/d         |                        |
| SWR/J                           | +           | +           | 22.0                   | n/d         |                        |
| C57BL/6J                        | +           | -           |                        | ++          | 28.3                   |
| DBA/2J                          | +           | -           |                        | +           | 40.0                   |
| A/J                             | +           | -           |                        | +           | 40.0                   |
| A/HeJ                           | +           | -           |                        | ++          | 20.0                   |
| NOD/LtJ                         | +           | -           |                        | n/d         |                        |
| FVB/NCr                         | +           | -           |                        | n/d         |                        |
| C57BL/10J                       | +           | -           |                        | -           |                        |
| NZB/BlNJ                        | +           | -           |                        | ++          | 22.1                   |
| NZW/LacJ                        | +           | -           |                        | ++          | 20.0                   |
| 129X1/SvJ                       | +           | +/-         |                        | ++          | 22.1                   |
| BALB/cJ                         | +           | +/-         |                        | ++          | 20.0                   |
| BALB/cByJ                       | +           | -           |                        | +           | 40.0                   |
| CBA/JCr                         | -           | -           |                        | n/d         |                        |
| B10.D2n                         | +           | -           |                        | -           |                        |
| B10.S/SgSnJ                     | +           | -           |                        | -           |                        |
| C3H/HeJ                         | -           | +/-         |                        | ++          | 22.5                   |
| C3H/HeN                         | -           | +/-         |                        | ++          | 20.0                   |
| C3H. <i>Bphs</i> <sup>SJL</sup> | +           | -           |                        | ++          | 20.0                   |

Animals were sensitized with 200 ng PTX by i.v. injection and challenged three days later by i.v. injection of histamine (25 mg/kg), serotonin (0.39 – 50 mg/kg), or bradykinin (10 – 80 mg/kg). 4-17 mice were examined at a given dose. Dosages are based on mg/kg dry weight free base or peptide. Deaths were recorded at 30 min and the results expressed as the number dead over the number studied. LD<sub>50</sub>s for Bpss and Bphs were calculated using GraphPad Prism. Degree of sensitivity for Bpss and Bpbs were assigned based on LD<sub>50</sub> values. Bpss: “+++” = LD50 1.0-3.0, “++” = 3.0-25, “+” = >25. Bpbs: “++” = LD<sub>50</sub> 10-25, “+” = >25. Shaded bars indicate susceptibility. “+/-” indicates partial sensitivity, but did not achieve significance. “n/d”, not determined.

**Supplementary Table 2. Loss of G $\alpha_{i1}$  or G $\alpha_{i3}$  mimics PTX to elicit histamine sensitization.**

| G $\alpha$        | Genotype   |                                 |           |                                             |
|-------------------|------------|---------------------------------|-----------|---------------------------------------------|
|                   | +/+        | +/-                             | -/-       |                                             |
| G $\alpha_0$      | 17/69 (25) | 2/22 (9)                        | 1/12 (8)  | <i>n.s. vs WT</i>                           |
| G $\alpha_{01}$   | 17/69 (25) | 0/7 (0)                         | 0/4 (0)   | <i>n.s. vs WT</i>                           |
| G $\alpha_{02}$   | 17/69 (25) | 0/13 (0)                        | 2/11 (0)  | <i>n.s. vs WT</i>                           |
| G $\alpha_{i1}$   | 17/69 (25) | 0/4 (0) <i>n.s. vs. WT</i>      | 7/7 (100) | <i>P = 0.0002 vs WT, P = 0.003 vs HET</i>   |
| G $\alpha_{i2}$   | 17/69 (25) | 6/28 (21) <i>n.s. vs WT</i>     | 1/23 (4)  | <i>n.s. vs WT</i>                           |
| G $\alpha_{i3}$   | 17/69 (25) | 3/4 (75) <i>P=0.06 vs. WT</i>   | 6/8 (75)  | <i>P = 0.008 vs WT, n.s. vs. HET</i>        |
| G $\alpha_{i1/3}$ | 17/69 (25) | 4/4 (100) <i>P=0.006 vs. WT</i> | 9/12 (75) | <i>P = 0.001 vs WT, P &lt; 0.0001 vs WT</i> |

Mice deficient for G $\alpha_{i0}$  subunits were analyzed for histamine sensitivity in the absence of PTX exposure. Mice received 100mg/kg histamine i.v. and deaths were recorded within 30 minutes. Results are presented as number affected/total number analyzed, with the percent affected in parentheses. G $\alpha$ -deficient mice were of varying genetic backgrounds, but since no differences among WT (+/+) of these backgrounds were found, these results were pooled. Chi-square analysis was used to detect differences as indicated.
